# Supplementary figures and images for: Dioxygen activation by a dinuclear nickel thiolate complex: structural characterization of the ligand oxidized productElectronic supplementary information (ESI) available: Fig. S1: 1H NMR spectrum of 2. Fig. S2: Electronic spectrum showing conversion of 1 to 2. See http://www.rsc.org/suppdata/cc/b2/b211395n/
Source: Royal Society of Chemistry journal article supplement (doi:10.1039/b211395n), 2003-01-14

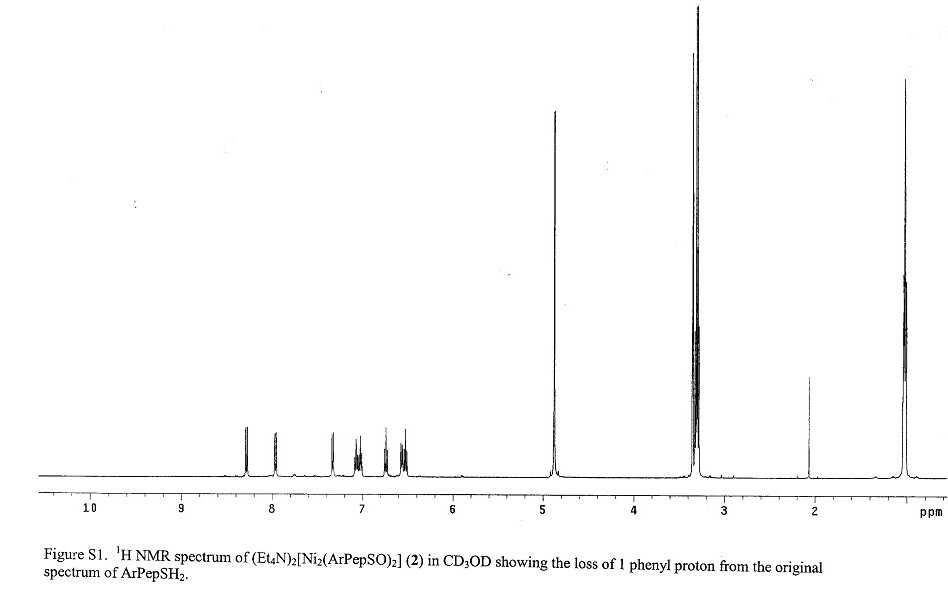


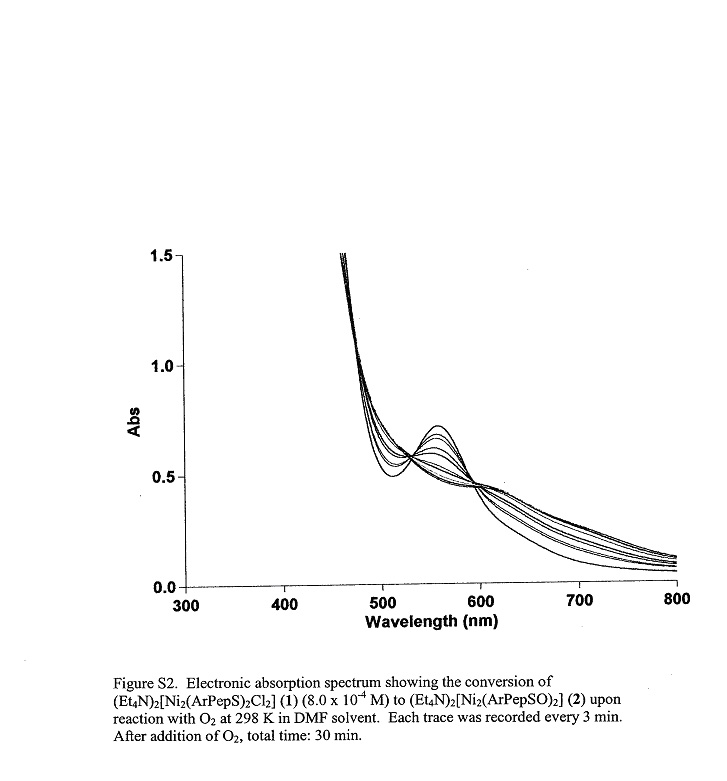

Supplement: b211395n.doc [file b211395n.doc]
